## COMMENTS AND RESPONSES

### Hypoglycemia Unawareness Is Associated With Reduced Adherence to Therapeutic Decisions in Patients With Type 1 Diabetes: Evidence from a Clinical Audit

Response to Graveling and Frier

**W**e thank Graveling and Frier (1) for their comments, which underline the clinical difficulties in managing patients with impaired awareness of hypoglycemia (IAH). An audit of a U.K.-based structured education program for patients with type 1 diabetes, Dose Adjustment For Normal Eating (DAFNE), found that 48% of those who reported IAH at baseline reported restoration of awareness at 1 year (2). However, a significant proportion of patients remain hypoglycemia unaware if treated with purely educational strategies. Neuroimaging data from our group suggest that patients with hypoglycemia unawareness have reduced activation in appetite motivational networks associated

with integrated behavioral responses to hypoglycemia (3). This may suggest that in some patients behavioral strategies may have more benefit. Indeed, behavioral interventions such as blood glucose awareness training have shown encouraging results with improved counterregulatory responses to hypoglycemia as well as reduction in glycosylated hemoglobin, and results were sustained up to 5 years later with a "booster" session (4).

What our study (5) perhaps highlights is that we still do not have an understanding of all the factors active in an individual patient leading to IAH. This understanding may enable us to choose the most appropriate strategy for reversing this condition. However, it may be pragmatic to recognize that treatment of patients with hypoglycemia unawareness may well require a combination of educational and behavioral strategies, in conjunction with the use of technology such as continuous insulin pump therapy and online glucose monitoring with any of these techniques in isolation failing to deliver lasting benefit.

CHARLOTTE B. SMITH, BSC, MB, BS  
PRATIK CHOUDHARY, MB, BS, MRCP  
ANDREW PERNET, RGN  
DAVID HOPKINS, MB, BS, FRCP  
STEPHANIE A. AMIEL, BSC, MD, FRCP

From the Diabetes Research Group, King's College London School of Medicine, King's College, London, U.K.

Corresponding author: Charlotte Smith, charlotte.b.smith@doctors.org.uk.  
DOI: 10.2337/dc09-1847

© 2010 by the American Diabetes Association. Readers may use this article as long as the work is properly cited, the use is educational and not for profit, and the work is not altered. See <http://creativecommons.org/licenses/by-nc-nd/3.0/> for details.

**Acknowledgments**—No potential conflicts of interest relevant to this article were reported.

#### References

1. Graveling AJ, Frier BM. Hypoglycemia unawareness is associated with reduced adherence to therapeutic decisions in patients with type 1 diabetes: evidence from a clinical audit: response to Smith et al. (Letter). *Diabetes Care* 2010;33:e15. DOI: 10.2337/dc09-1594
2. Lawrence IG, Hopkins D, Mansell P, Thompson G, Amiel S, Heller SR. DAFNE (Dose Adjustment For Normal Eating) training delivered in routine clinical practice is associated with a significant improvement in glycaemic control and a reduction in severe hypoglycaemia (Abstract). *Diabet Med* 2008;25:P115
3. Dunn JT, Cranston I, Marsden PK, Amiel SA, Reed LJ. Attenuation of amygdala and frontal cortical responses to low blood glucose concentration in asymptomatic hypoglycemia in type 1 diabetes: a new player in hypoglycemia unawareness? *Diabetes* 2007;56:2766–2773
4. Cox DJ, Gonder-Frederick L, Julian DM, Clarke W. Long-term follow-up evaluation of blood glucose awareness training. *Diabetes Care* 1994;17:1–5
5. Smith CB, Choudhary P, Pernet A, Hopkins D, Amiel SA. Hypoglycemia unawareness is associated with reduced adherence to therapeutic decisions in patients with type 1 diabetes: evidence from a clinical audit. *Diabetes Care* 2009;32:1196–1198
